# Supplementary material for: Molecular Characteristics and Polymorphisms of Buffalo (Bubalus bubalis) ABCG2 Gene and Its Role in Milk Fat Synthesis
Source: MDPI journal article supplement (doi:10.3390/ani13193156), 2023-10-09
Supplement: s1 [file s1]

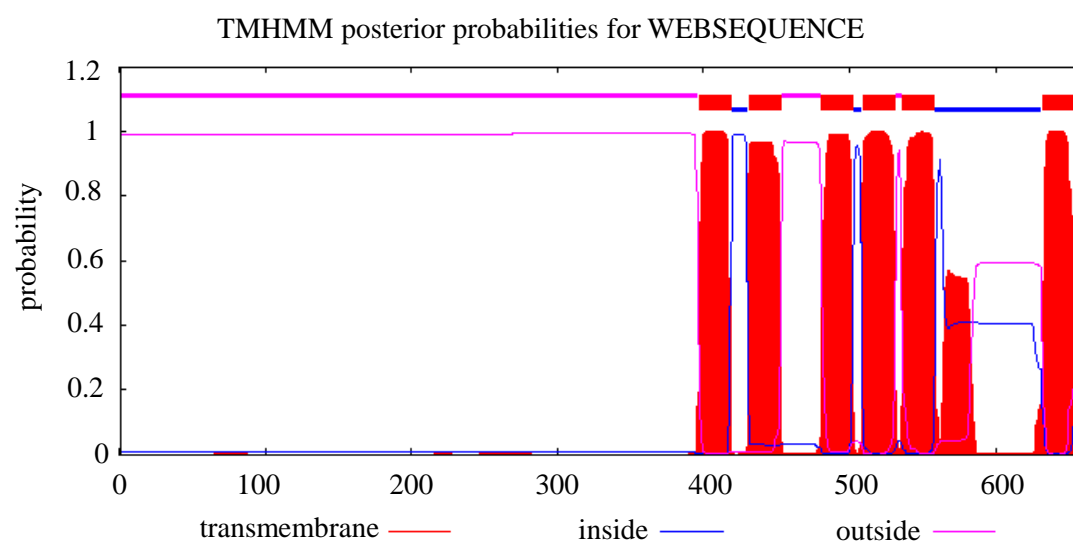

**Figure S1.** Predicted transmembrane helices in buffalo ABCG2

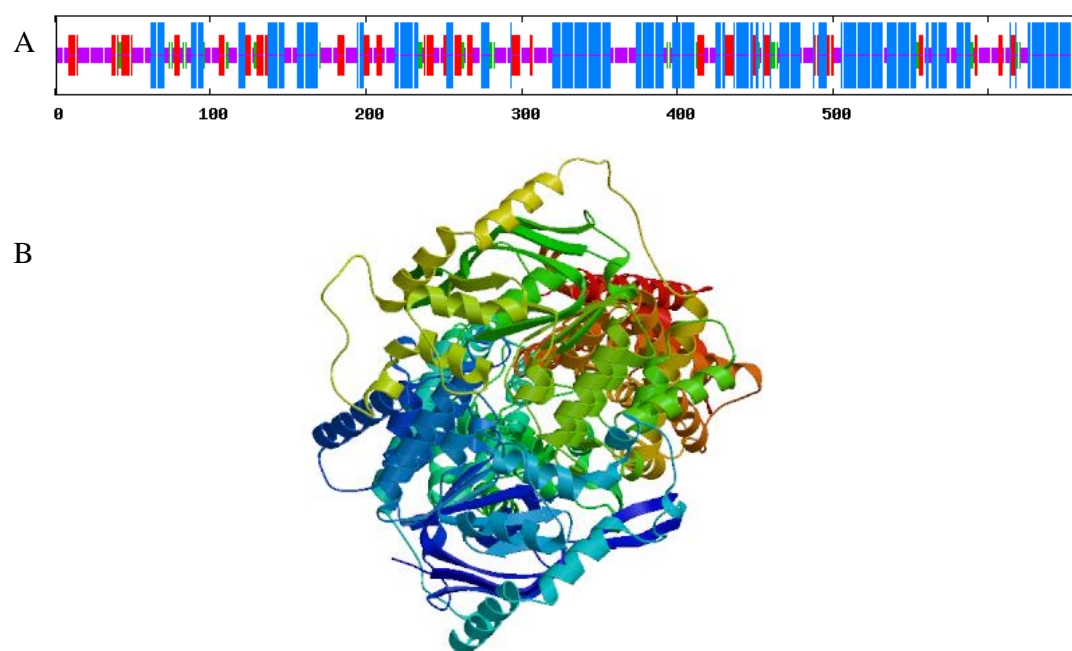

**Figure S2. Structures prediction of buffalo ABCG2.** (A) The secondary structure of ABCG2 protein. (B) The tertiary structure of ABCG2 protein.

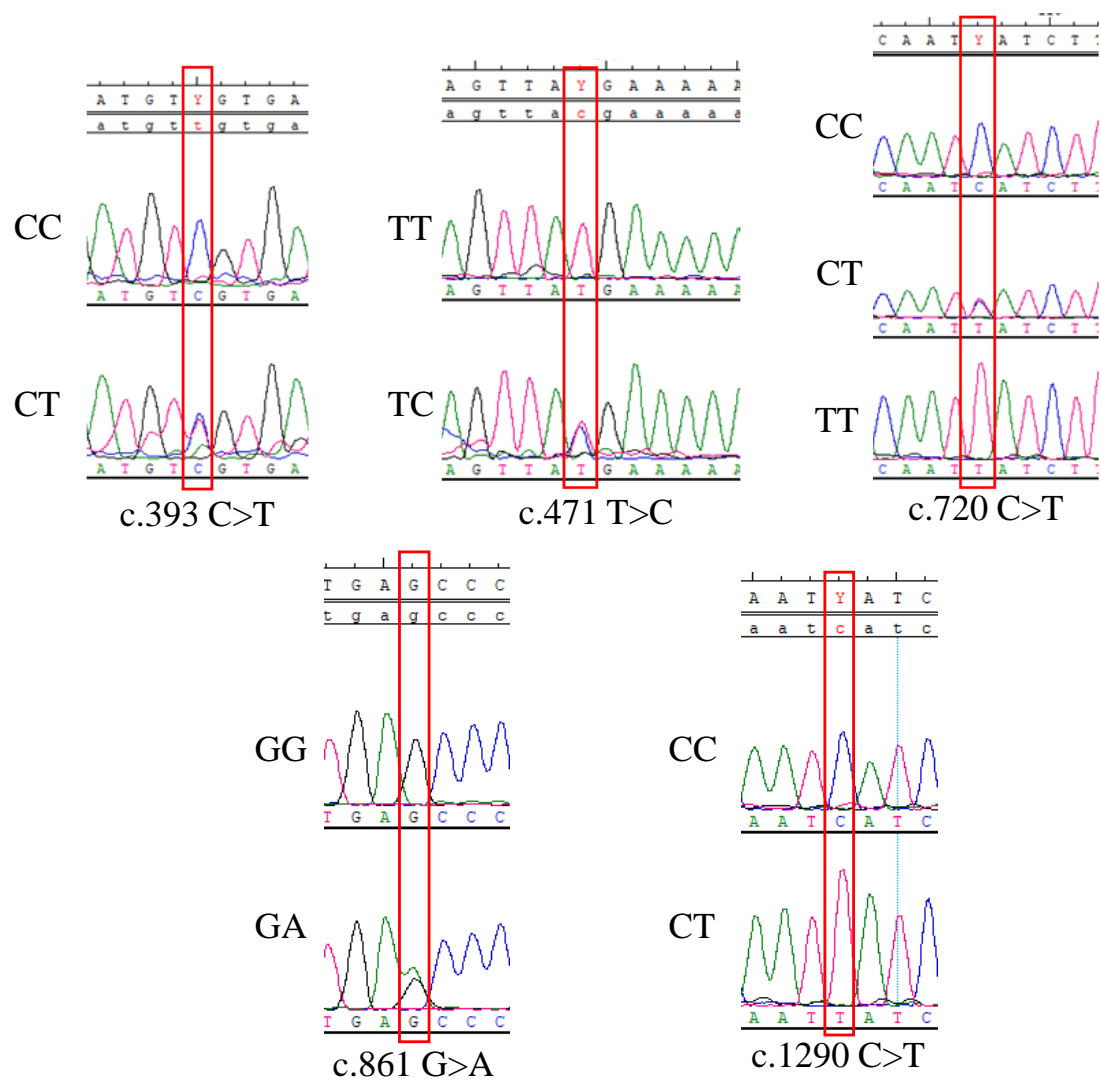

**Figure S3.** Sequencing results indicate polymorphisms in the coding region of buffalo *ABCG2*

**Figure S4.** Nucleotide differences of the *ABCG2* haplotype sequences among some species of Bovidae. Number represents the position of coding region. Dots (.) denote identity with the Buffalo\_hap1. Nucleotide substitutions are denoted by different letters. Missing information is denoted by a question mark (?).
