# Supplementary material for: Molecular Characteristics and Polymorphisms of Buffalo (Bubalus bubalis) ABCG2 Gene and Its Role in Milk Fat Synthesis
Source: MDPI journal article supplement (doi:10.3390/ani13193156), 2023-10-09
Supplement: s1 [file s1]

**Table S1. Primers information used for qPCR investigated in this study**

| Gene            | Accession number | Primer sequences (5'-3')                                         | Amplification efficiency |
|-----------------|------------------|------------------------------------------------------------------|--------------------------|
| <i>GAPDH</i>    | XM_006065800     | F: ATGGAGAAGGCTGGGGCTCA<br>R: GCAGGAGGCATTGCTGACAA               | 2.058                    |
| <i>RPS23</i>    | XM_006059350     | F: ACCGACGAGACCAGAAGT<br>R: CTCCAGGAATGTCACCAA                   | 2.012                    |
| <i>ACTB</i>     | NM_001290932     | F: TGGGCATGGAATCCTG<br>R: GCGCGATGATCTTGAT                       | 2.032                    |
| <i>AGPAT6</i>   | NM_001290846     | F: CTTTGCGTGGGCTACCTTG<br>R: TCTTGGTCACCTCGTCGTC                 | 2.032                    |
| <i>PPARG</i>    | XM_006077448     | F: GCTCCAAGAGTACCAAAGTG<br>R: GTCCTCCTGAAGAAACCCTT               | 2.096                    |
| <i>SREBF1</i>   | KU517672         | F: GCACCGAGGCCAAGTTGAATAA<br>R: CAGGTCCTTCAGCGATTTGCTT           | 2.041                    |
| <i>SREBF2</i>   | XM_006068914     | F: GCCAAGATGCACAAGTCTGGTGTT<br>R: TGCCCTTCAGGAGCTTGCTCT          | 2.099                    |
| <i>INSIG1</i>   | JX853922         | F: ACGTTCAGCTCTCCTTGACATT<br>R: CTGTCGTCCTATGTTTCCCAC            | 2.091                    |
| <i>INSIG2</i>   | NM_001290944     | F: AGCCAGGGAGGGAAATGACCAT<br>R: GCCTCTGCCTGTGGGTTACTCA           | 2.067                    |
| <i>PPARGC1A</i> | NM_177945        | F: CCACCGAGAATGAGGCTAGTCCTT<br>R: TTGACAAATGCTCTTCGCTTTATTGCTCCA | 2.089                    |
| <i>FASN</i>     | XM_006061793     | F: GGGCTCCACCACCGTGTTCCTCA<br>R: GCTCTGCTGGGCCTGCAGCTG           | 2.053                    |
| <i>ACC</i>      | XM_025281121     | F: CCTCTTCAGACAGGTTCAAGC<br>R: TTCACCGCACACTGTTCC A              | 1.968                    |
| <i>SCAP</i>     | XM_025272558     | F: CCATGTGCACTTCAAGGAGGA<br>R: TGTCGATCTTGCGTGTGGAG              | 1.972                    |
| <i>ABCG2</i>    | XM_006042277     | F: AGCAAATATCAATGGAGTCA<br>R: CGACATCATCTTGTACCACATA             | 2.062                    |

**Table S2. Primer information for polymorphism identification**

|         | Primer sequence (5'-3')                                 | Product length (bp) | Annealing temperature (°C) |
|---------|---------------------------------------------------------|---------------------|----------------------------|
| Exon 2  | F: TTTACCTGGACTATCAAC<br>R: ATGTCAATGAACCTACTTA         | 512                 | 50.0                       |
| Exon 3  | F: TTGTGCTTTTTTTTCTATC<br>R: CCAAATGTCAAATCTCTAT        | 304                 | 45.0                       |
| Exon 4  | F: GCTAAGAGGTAAAGCCTG<br>R: GCGGGTATAAAGAAAAGTTG        | 307                 | 48.5                       |
| Exon 5  | F: AGATATACTACAGAGTGATG<br>R: CTTGACCATACATATTATAG      | 325                 | 47.0                       |
| Exon 6  | F: GCTGGAACATTTTAGGAG<br>R: CTTACTGATGAATCCCTTGC        | 330                 | 51.0                       |
| Exon 7  | F: CAAGTTGAATGAGGAATAA<br>R: AGTGCTCCAAGTGACTC          | 344                 | 49.0                       |
| Exon 8  | F: CACCTCCCTCACTCTCTAA<br>R: CTAGTACAACCCATATCAGA       | 315                 | 49.0                       |
| Exon 9  | F: AATGAAGGTGCTAGAGTA<br>R: GGAATGGGGATAAATAAA          | 455                 | 48.9                       |
| Exon 10 | F: TAATAATAAAGGGTGTG<br>R: TAAGAATATGAAAACCTCTC         | 304                 | 44.0                       |
| Exon 11 | F: GGAAGAAAAATGACCTGTAAATGT<br>R: TCTCAGTCAACACTGGTAAC  | 264                 | 52.0                       |
| Exon 12 | F: CTGTATAGCAGGGAGTACATCTG<br>R: ACTTGATTTATAGTTTTGAGAA | 310                 | 47.0                       |
| Exon 13 | F: CCCTGATAGACAGTGTTGGATTA<br>R: CCTTAAAGCAGAGTCTGATGTA | 315                 | 49.5                       |
| Exon 14 | F: GTCCTTAGCAGTATTCACGAGAC<br>R: ACTCTCCTTCATTGTCCTAAA  | 301                 | 49.5                       |
| Exon 15 | F: AATTCTTTGGAAACTTTTGTC<br>R: CCTCAGCCCAGTAGTATT       | 221                 | 51.0                       |
| Exon 16 | F: TCTTTAAGGAACAGTGAAT<br>R: CAAGTGAAAAGAAGACAACC       | 381                 | 47.8                       |

**Table S3. Information of shRNA used for knockdown of *ABCG2***

| Name of shRNA | Sequences (5'-3')                                          |
|---------------|------------------------------------------------------------|
| ABCG2_sh1_F   | CCGGGTATTGCAATGGAGCTTATTACTCGAGTAATAAGCTCCATTGCAATACTTTTG  |
| ABCG2_sh1_R   | AATTCAAAAAGTATTGCAATGGAGCTTATTACTCGAGTAATAAGCTCCATTGCAATAC |
| ABCG2_sh2_F   | CCGGGAGGATGTTACCAAGTATTATCTCGAGATAATACTTGGTAACATCCTCTTTTG  |
| ABCG2_sh2_R   | AATTCAAAAAGAGGATGTTACCAAGTATTATCTCGAGATAATACTTGGTAACATCCTC |
| ABCG2_sh3_F   | CCGGGGAAGAATCACGTAGCCTTGGCTCGAGCCAAGGCTACGTGATTCTTCCTTTTG  |
| ABCG2_sh3_R   | AATTCAAAAAGGAAGAATCACGTAGCCTTGGCTCGAGCCAAGGCTACGTGATTCTTCC |

**Table S4. Haplotype information of buffalo *ABCG2* gene**

| Haplotype    | Accession number | Alleles | Actual frequency | Expected frequency |
|--------------|------------------|---------|------------------|--------------------|
| Buffalo_hap1 | ON515705         | CTCGC   | 0.892            | 0.892              |
| Buffalo_hap2 | ON515706         | CTCGT   | 0.010            | 0.010              |
| Buffalo_hap3 | ON515707         | CTCAC   | 0.024            | 0.024              |
| Buffalo_hap4 | ON515708         | CTTGC   | 0.049            | 0.049              |
| Buffalo_hap5 | ON515709         | CCCGC   | 0.010            | 0.010              |
| Buffalo_hap6 | ON515710         | CCTGC   | 0.005            | 0.005              |
| Buffalo_hap7 | ON515711         | TTCGC   | 0.010            | 0.010              |
